# Supplementary material for: La ciudad, la esquina y la casa
Source: Royal Society of Chemistry journal article supplement (doi:10.1039/c8fd00056e), 2007-01-01
Supplement: c8fd00056e1.pdf [file c8fd00056e1.pdf]

## **Supplementary Information**

### **Ligament Size-Dependent Electrocatalytic Activity of Nanoporous Ag Network for CO<sub>2</sub> Reduction**

Wanfeng Yang<sup>a</sup>, Wensheng Ma<sup>b</sup>, Zhonghua Zhang<sup>b</sup>, Chuan Zhao<sup>a</sup>

<sup>a</sup>School of Chemistry, Faculty of Science, University of New South Wales Sydney, New South Wales 2052, Australia

<sup>b</sup>Key Laboratory for Liquid-Solid Structural Evolution and Processing of Materials (Ministry of Education), School of Materials Science and Engineering, Shandong University, Jingshi Road 17923, Jinan 250061, P.R. China

\*Corresponding author. Email: [chuan.zhao@unsw.edu.au](mailto:chuan.zhao@unsw.edu.au), [zh\\_zhang@sdu.edu.cn](mailto:zh_zhang@sdu.edu.cn).

**This part includes:**

**Figures S1-S3**

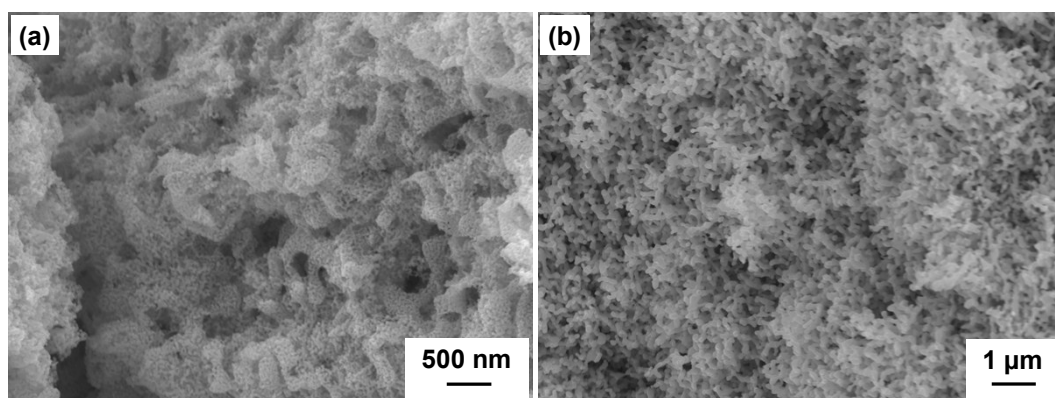

**Figure S1.** SEM images with lower magnification of (a) np-Ag (21 nm) and (b) np-Ag (87 nm).

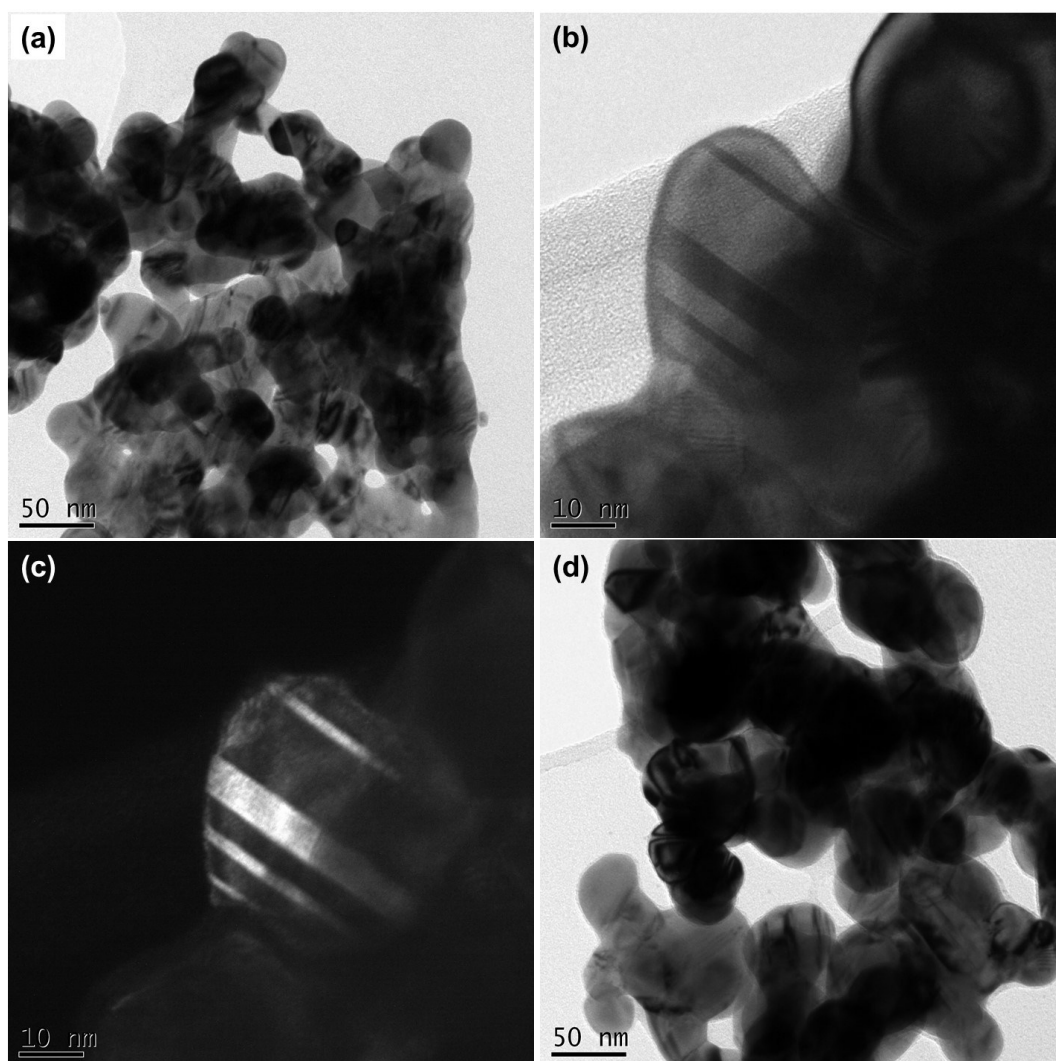

**Figure S2.** (a, b) Bright field TEM images and (c) dark field TEM image of np-Ag (21 nm).  
(d) Bright field TEM image of np-Ag (87 nm).

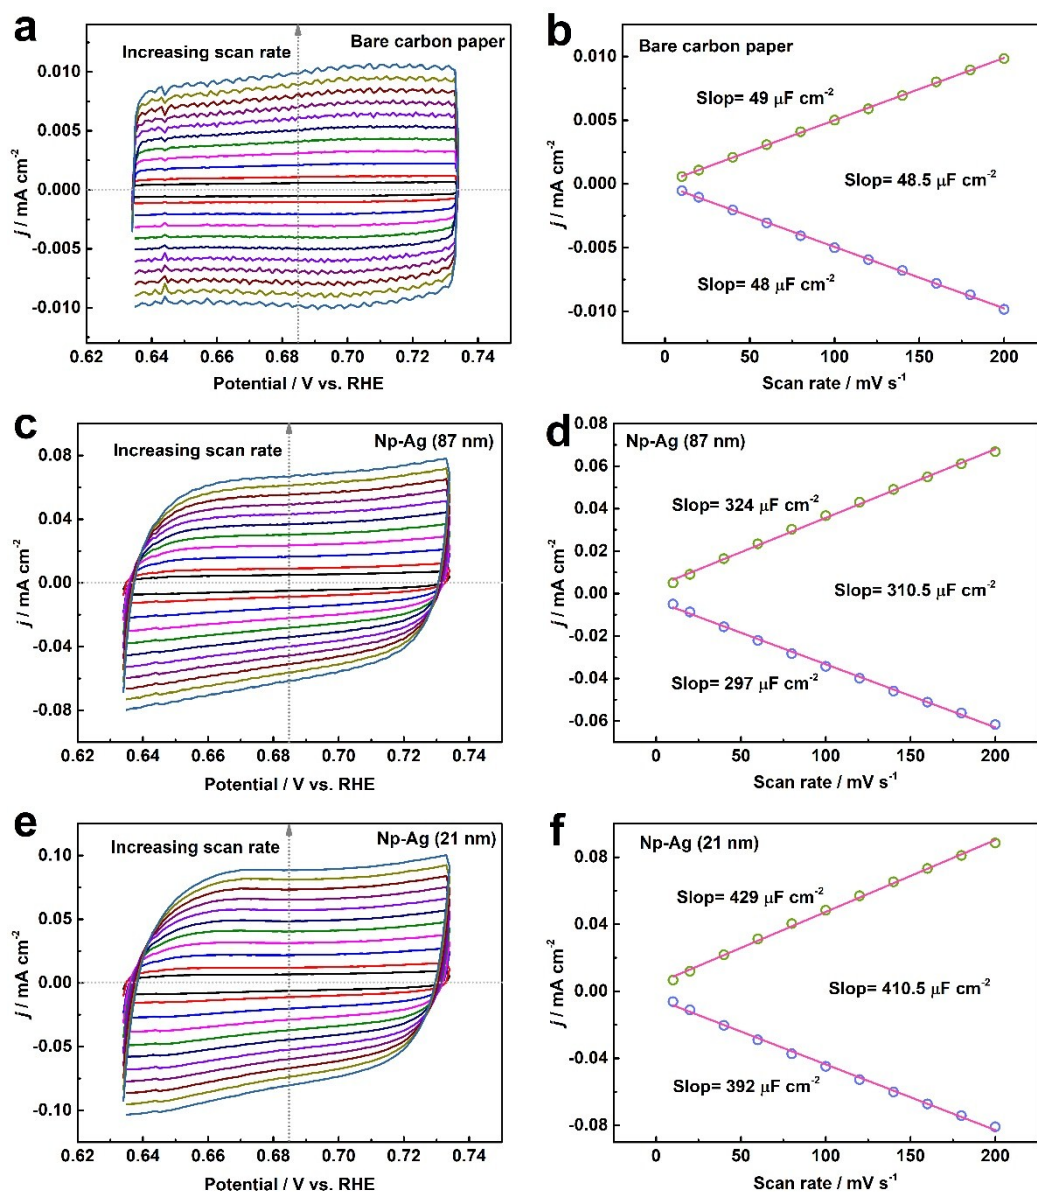

**Figure S3.** Electrochemical capacitance measurements to determine the ECSA of electrodes. (a, c, e) CVs measured at different scan rates and (b, d, f) the measured capacitive currents plotted as a function of scan rate of bare carbon paper, np-Ag (87 nm) and np-Ag (21 nm), respectively.
